# Supplementary material
Source: Copernicus journal article supplement (doi:10.5194/egusphere-2026-2454)
Supplement: Supplementary file 1 [file egusphere-2026-2454-supplement.pdf]

# Supplementary Material

## S1. KII and casual mapping methods

### Figure S1. Semi-Structured Interview Guide

5 **Questions:**

#### **Role & Connection to Beira**

- 10
1. Can you explain your connection and experience of Mozambique, specifically the Beira region?
    - a. When?
    - b. Specific to pre – or post Idai?

#### **Major Socio-Economic Changes (2000-2019)**

- 15
2. How has the socio-economic situation of Beira and the region changed over the past 20 years? (E.g demographics, land-use, governance)

#### **Groups Most Affected (who/where/when)**

- 20
3. Who do you think was most affected? Which groups, where, and when?

#### **Key Drivers of Idai's Impacts**

- 25
4. What do you think were the main socio-economic drivers of the impacts of Idai?
    - a. For example: urban expansion, lack of awareness, no options for evacuation, poor quality housing, poor infrastructure and drainage.
    - b.

#### **Root Causes Behind Those Drivers (land-use change)**

- 30
5. What factors or conditions lead to socio-economic changes that, according to you affected Idai's Impact?
    - a. What factors do you think were driving the drivers?
    - b. E.g. population growth, land-use changes.

35

#### **Relative Importance of Exposure vs Vulnerability**

6. To what extent do you believe the impacts were caused by the region's exposure and vulnerability?

40

### Post-Idai Recovery

7. Do you have a perspective on the post – Idai situation. \_What was the trend of reconstruction/ relocation?

45

8. Is there anything else you would like to add?

### End of interview

50

- Thank them for their time and insights
- Explain the next steps, including how their inputs will contribute to the guidance document

55

Table S1. Thematic coding method to create the causal map.

| Method Steps                                                                                                                                                                                                                                                                                 | Input                                                                  | Output                                                                                                                      | Source                                                                                       |
|----------------------------------------------------------------------------------------------------------------------------------------------------------------------------------------------------------------------------------------------------------------------------------------------|------------------------------------------------------------------------|-----------------------------------------------------------------------------------------------------------------------------|----------------------------------------------------------------------------------------------|
| <b>1. Semi-structured interviews</b>                                                                                                                                                                                                                                                         | Semi-structured interview question framework: informed from literature | Transcribed interview recordings                                                                                            | (Galletta & Cross, 2013). (Moser & Korstiens, 2017).                                         |
| <b>2. Re-read interview transcriptions</b>                                                                                                                                                                                                                                                   | Interview transcriptions                                               | Understanding of the data and interview                                                                                     | (Kenzie et al. 2024)                                                                         |
| <b>3. Qualitative analysis of interviews:</b><br>a. Open Coding of the raw text to discover themes and select relevant 'data segments'<br>b. Segments categorized into 'higher order' categories according to risk components described in Cardona et al., (2012) and Simpson et al. (2021). | Interview transcriptions                                               | Qualitatively coded quotations – based on grounded theory methodologies. Example of qualitative analysis shown in Appendix. | (Kim & Anderson, 2012) (Moser & Korstiens, 2017)                                             |
| <b>4. Transform variables and causal relationships into "words-and-arrow" diagrams:</b><br>Create 'partial' or 'microstructure maps' of interview specific maps constructed from variables and causal relationships identified from Step 3.                                                  | Interview - coded quotations based on categories.                      | Micro-structure maps of identified key categorized variables and their interrelationships                                   | (Newberry & Carhart, 2023) (Kim and Anderson, 2012) (Kenzie et al. 2024) (Hanf et al., 2025) |
| <b>5. Add all variables and relationships into a causal mapping table (Excel)</b>                                                                                                                                                                                                            | Interview specific micro-structure maps                                | Table – detailing variables, links, description, category direction and quotation                                           | (Kenzie et al., 2024)                                                                        |
| <b>6. Create causal map – upload table into visualisation software – (Kumu)</b>                                                                                                                                                                                                              | Causal mapping table                                                   | Overall causal map – in Kumu                                                                                                | (Kenzie et al., 2024)                                                                        |
| <b>7. Develop causal loop diagram</b>                                                                                                                                                                                                                                                        | Identified key causal loop from causal map. Synthesized information    | Causal Loop diagram of identified key drivers and their interactions                                                        | (Kim and Anderson, 2012)                                                                     |

60

**Table S2. Example interview quotes and causal mapping method.**

| Example Quote                                                                                                                                                                                                                                                                                                                                                                                                        | Interview Number | Category                   | Sub-Category               | Description                                                                             | Causal Map Variables                                                         |
|----------------------------------------------------------------------------------------------------------------------------------------------------------------------------------------------------------------------------------------------------------------------------------------------------------------------------------------------------------------------------------------------------------------------|------------------|----------------------------|----------------------------|-----------------------------------------------------------------------------------------|------------------------------------------------------------------------------|
| " And around Beira, it's very flat and there's lots of, river channels. Yeah. And so there was just mass flooding"                                                                                                                                                                                                                                                                                                   | INT_02           | Exposure                   | Physical Exposure          | The geography of the region is highly exposed                                           | Geography of Beira: Low elevation, proximity to the coast and river channels |
| "Beira is a low-lying city... with large parts of the city not served by drainage infrastructure."                                                                                                                                                                                                                                                                                                                   | INT_07           | Exposure                   | Physical                   | Poor drainage systems in Beira                                                          | Inadequate Urban Drainage                                                    |
| "after Idai... people could still try to plant some fields... but then again there was a crop failure the next year."                                                                                                                                                                                                                                                                                                | INT_06           | Response                   | Economic Vulnerability     | Recurring flooding, preventing crop planting, hindering recovery                        | Crop Failure                                                                 |
| "even when floods are not so severe, you still have damage to infrastructure because infrastructure in itself, it's usually poorly maintained."                                                                                                                                                                                                                                                                      | INT_06           | Vulnerability              | Physical Vulnerability     | Very poor infrastructure quality                                                        | Poor Infrastructure Quality                                                  |
| "about 90% of the infrastructure in Beira was affected by the cyclone. in terms of electricity, water access, all of that, it was broken down "                                                                                                                                                                                                                                                                      | INT_03           | Impact                     | Direct Impact              | Direct impact in Beira from Idai                                                        | Extensive Infrastructure Damage                                              |
| " if you live in rural Mozambique and you don't actually own the land and you live in a house that you made from pretty much, like, scavenged materials in the landscape, then you don't really have anything to your name. So you don't you don't easily have the ability to move into a city or to rent a place "                                                                                                  | INT_02           | Vulnerability              | Social Vulnerability       | Systemic poverty and land tenure ship leaves rural households with very few options     | Insecure Land Tenure                                                         |
| "And the thing is that for Beira, a lot of the people living in Beira are involved in agriculture. They they do agriculture projects, and I don't quite remember the statistics, but a lot of the livelihoods are linked to agricultural activities"                                                                                                                                                                 | INT_01           | Vulnerability              | Social Vulnerability       | Dependence on urban based food systems                                                  | Reliance on urban agriculture                                                |
| "Four or five years after the cyclone hit... some people still have open roofs or leaking roofs."                                                                                                                                                                                                                                                                                                                    | INT_04           | Response / Indirect Impact | Response / Indirect Impact | Lack of reconstruction and slow response after the cyclone                              | Slow Reconstruction after Idai                                               |
| "In the aftermath of Idai: in order to get something going, a lot of the young men went into charcoal burning. And charcoal burning involves depletion of the forest area and also some mangroves for fuel. So there was an influx of charcoal on the market, and even the price dropped. And when you are removing the vegetation cover, You are making the city more exposed to the severe impacts from cyclone. " | INT_03           | Response / Indirect Impact | Response / Indirect Impact | Indirect impact of charcoal production and lack of alternatives                         | Environmental Degradation / Loss of forest cover                             |
| " The vulnerability of the people, you know, by virtue of being poor... makes the impacts of the cyclone much worse."                                                                                                                                                                                                                                                                                                | INT_05           | Vulnerability              | Economic Vulnerability     | High economic vulnerabilities made the impacts much worse                               | High socio-economic vulnerabilities                                          |
| "If it wipes people's farms out, that might lead them to harvest more charcoal to make up for the lost income."                                                                                                                                                                                                                                                                                                      | INT_08           | Response/ Indirect Impact  | Response / Indirect Impact | Feedback effect of losing crops to flooding impacts, results in even more deforestation | Charcoal Production                                                          |
| "This wasn't something it wasn't something they had experienced before, and they were totally unprepared To deal with the sort of impacts that occurred because a lot of people were affected. "                                                                                                                                                                                                                     | INT_03           | Vulnerability              | Social Vulnerability       | Total lack of awareness and preparedness for the scale of the cyclone                   | Lack of preparedness                                                         |

65

70

75

## S2. Additional compound flood modelling information

**Table S3. LULC reclassification and Manning values.**

80

| Lisboa et al., (2024)<br>LULC Classes | Lisboa et al., (2024)<br>LULC class description | Reclassified Vito 2019 LULC Class | Reclassified Vito 2019 LULC class description | Assigned Mannings' N Value |
|---------------------------------------|-------------------------------------------------|-----------------------------------|-----------------------------------------------|----------------------------|
| Forest                                | 1                                               | 114                               | Closed forest deciduous broad leaf            | 0.1                        |
| Mangrove                              | 2                                               | 122                               | Open forest evergreen broadleaf               | 0.11                       |
| Forestry Plantation                   | 3                                               | 126                               | Open forest unknown                           | 0.1                        |
| Cropland                              | 4                                               | 40                                | Cultivated and managed vegetation             | 0.037                      |
| Grassland                             | 5                                               | 30                                | Herbaceous vegetation                         | 0.034                      |
| Wetland                               | 6                                               | 90                                | Herbaceous wetland                            | 0.035                      |
| Settlement                            | 7                                               | 50                                | Built up                                      | 0.1                        |
| Other land                            | 8                                               | 60                                | Bare/ Sparse                                  | 0.023                      |

Reclassification  
→

## S3. Additional Results

85

The Figure S2 shows the discharge response difference between a large river (the Buzi river) and a smaller river located within the study region.

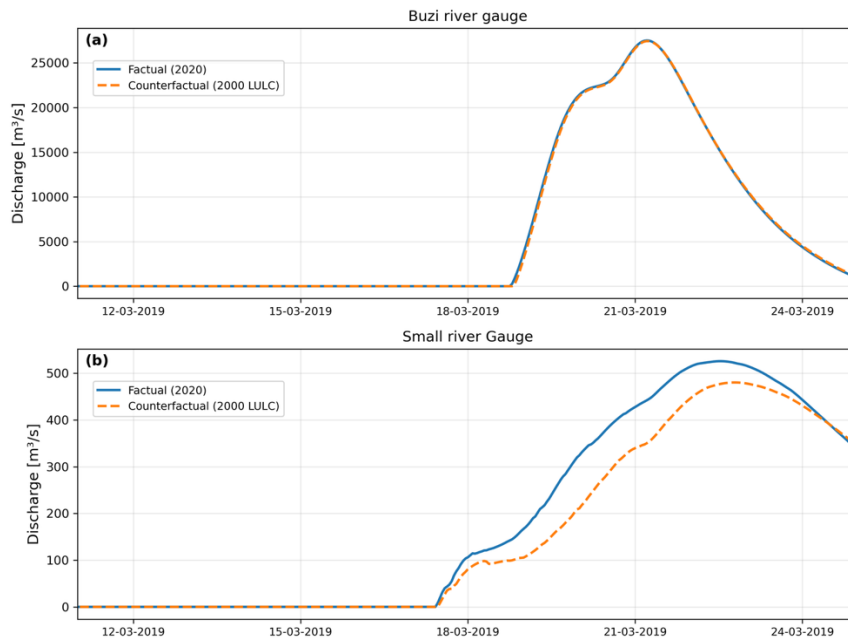

90 **Figure S2. Discharge timeseries for two river gauges station showing the difference in discharge between the factual and counterfactual LULC scenario.**

**a) shows minimal difference in discharge over time for the Buzi River time gauge.**

**b) The discharge for the factual LULC scenario is greater, and peaks earlier for the small river.**

95
